# Supplementary material
Source: Springer Nature journal article supplement (https://www.springermedizin.de/resource/supplementary/13058_2012_3150_MOESM14_ESM.pdf/9703386)
Supplement: MOESM14 [file 9703386]

**A****NKI295 cohort****Hazard Ratio: 3.10**

(95% CI 1.98 to 4.84)

 $p = 3.99e-07$ 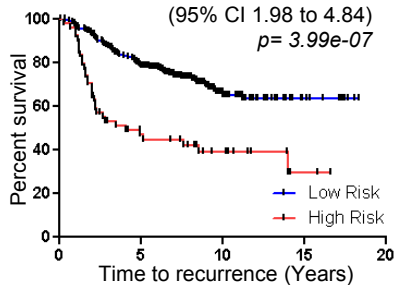**UNC232 cohort****Hazard Ratio: 2.84**

(95% CI 1.60 to 5.00)

 $p = 2.15e-05$ 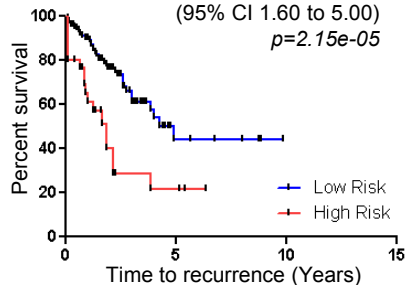**B**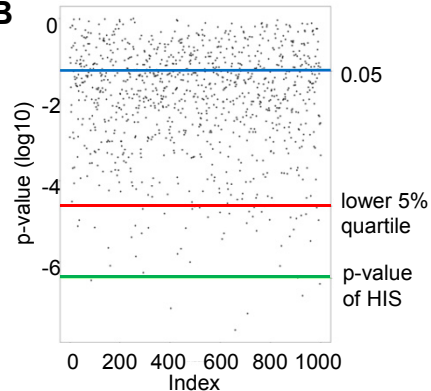**C**

| <b>NKI295 cohort</b> |           |               |                |
|----------------------|-----------|---------------|----------------|
| <b>Parameter</b>     | <b>HR</b> | <b>95% CI</b> | <b>p-value</b> |
| <b>ER status</b>     | 1.08      | 0.62-1.88     | 0.790          |
| <b>Grade</b>         | 1.50      | 1.08-2.10     | 0.017          |
| <b>Size</b>          | 1.84      | 1.16-2.91     | 0.010          |
| <b>Nodes</b>         | 0.80      | 0.52-1.23     | 0.313          |
| <b>HIS</b>           | 2.11      | 1.21-3.69     | <b>0.009</b>   |

| <b>UNC232 cohort</b> |           |               |                |
|----------------------|-----------|---------------|----------------|
| <b>Parameter</b>     | <b>HR</b> | <b>95% CI</b> | <b>p-value</b> |
| <b>ER status</b>     | 0.81      | 0.44-1.52     | 0.514          |
| <b>Grade</b>         | 1.59      | 0.92-2.74     | 0.094          |
| <b>Size</b>          | 1.49      | 1.05-2.10     | 0.024          |
| <b>Nodes</b>         | 5.88      | 2.36-14.6     | 0.000          |
| <b>HIS</b>           | 2.59      | 1.32-5.10     | <b>0.006</b>   |
